# Supplementary material
Source: Royal Society of Chemistry journal article supplement (doi:10.1039/d6nr00515b)
Supplement: d6nr00515b1.pdf [file d6nr00515b1.pdf]

Electronic Supplementary Material (ESI) for Nanoscale. This journal is © The Royal Society of Chemistry 2026

Supporting Information for

**Spatial construction of rhodium nanocrystals anchored onto TiO<sub>2</sub>-Decorated MXene architectures for enhanced photoelectrocatalytic methanol oxidation**

Haiyan He, Yahui Zhao, Chen Liu, Taiji Gan, Yuxi Fu, Lu Yang, Chi Zhang, Huajie Huang\*

College of Materials Science and Engineering, Hohai University, Nanjing 210098, China

E-mail: huanghuajie@hhu.edu.cn

**Supplementary Results**

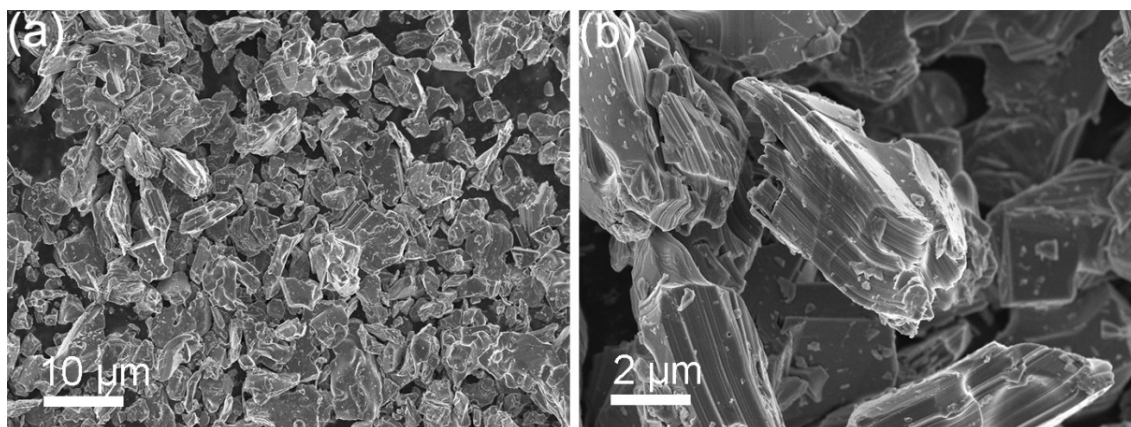

**Fig. S1** Representative SEM images of bulk Ti<sub>3</sub>AlC<sub>2</sub> at different magnifications

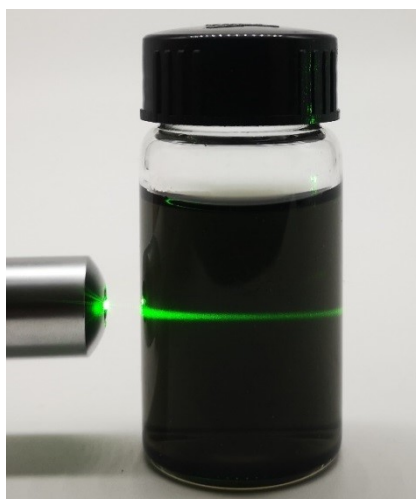

**Fig. S2** The Tyndall phenomenon of the as-obtained  $\text{Ti}_3\text{C}_2\text{T}_x$  MXene solution

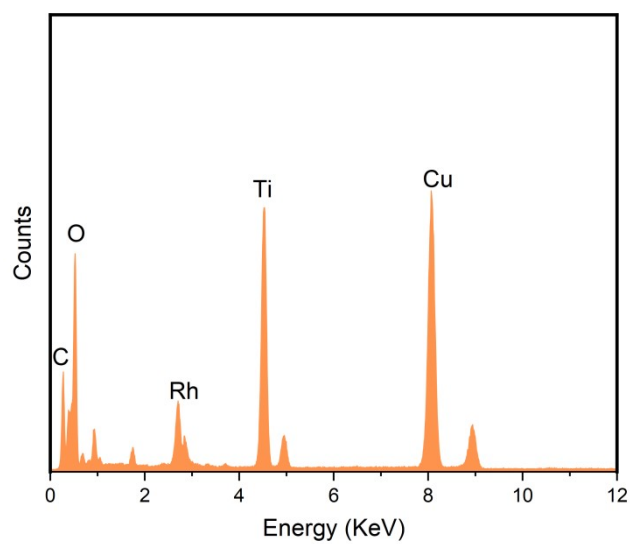

**Fig. S3** EDX spectrum of the Rh/TiO<sub>2</sub>-MX(24h) catalyst. The Cu signals were also detected because the sample was held on a Cu grid.

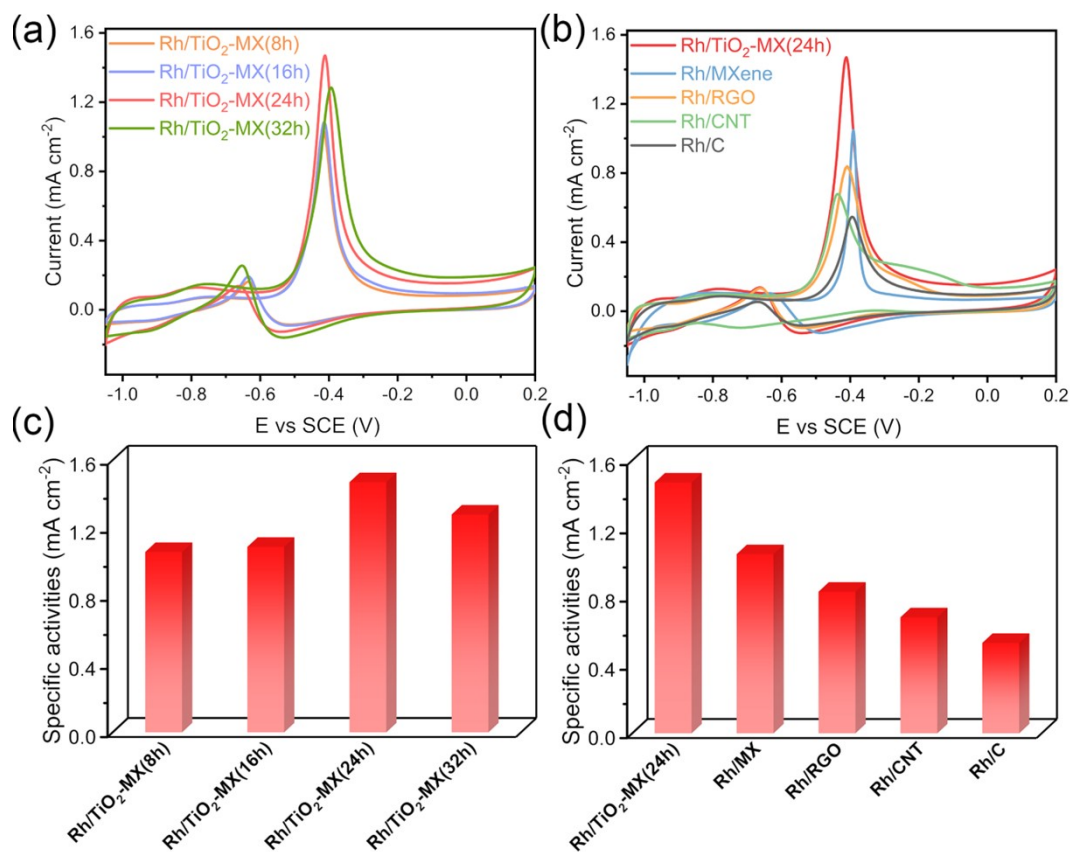

**Fig. S4** The ECSA-normalized CV curves of (a) diverse Rh/TiO<sub>2</sub>-MX and (b) Rh/MXene, Rh/RGO, Rh/CNT and Rh/C catalysts in 1 M KOH with 1 M CH<sub>3</sub>OH solution. (c-d) Specific activities of various catalysts.

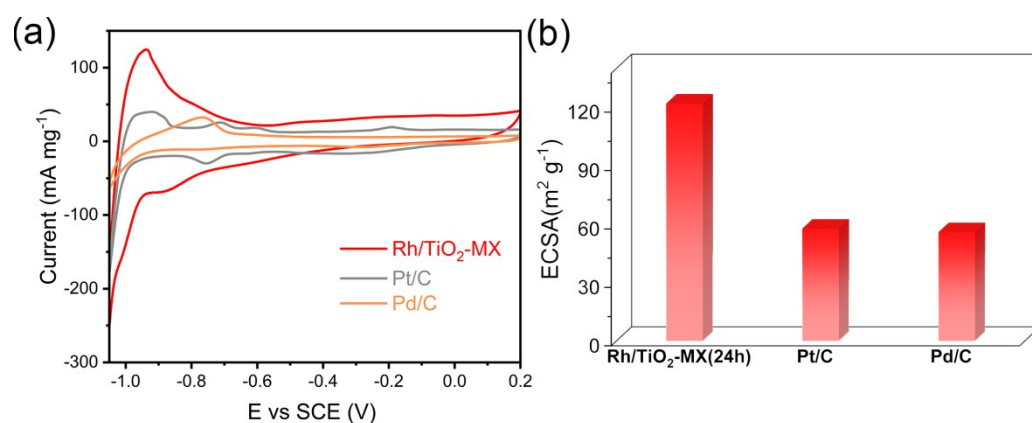

**Fig. S5** CV curves of (a) Rh/TiO<sub>2</sub>-MX(24h), Pt/C, and Pd/C in 1 M KOH solution at 50 mV s<sup>-1</sup>. (b) Specific ECSA values of these three catalysts.

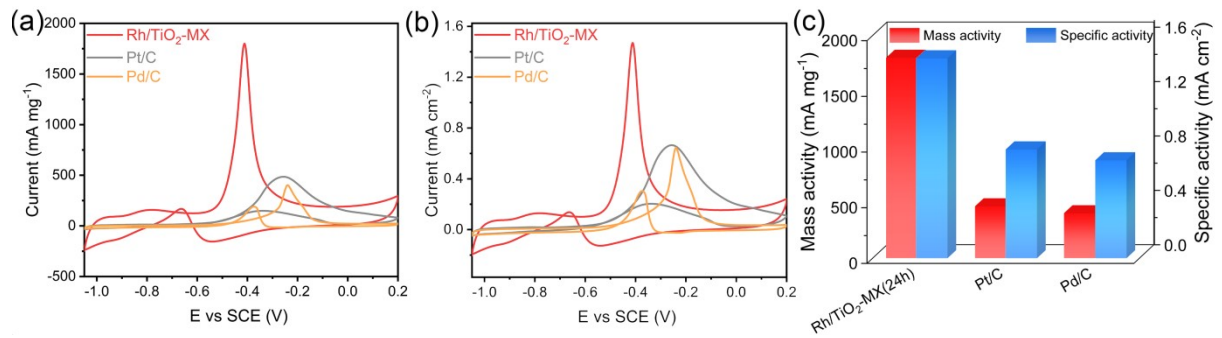

**Fig. S6** (a) CV and (b) ECSA-normalized CV curves of Rh/TiO<sub>2</sub>-MX(24h), Pt/C, and Pd/C in 1 M KOH with 1 M CH<sub>3</sub>OH. (c) Mass and specific activities of these three catalysts.

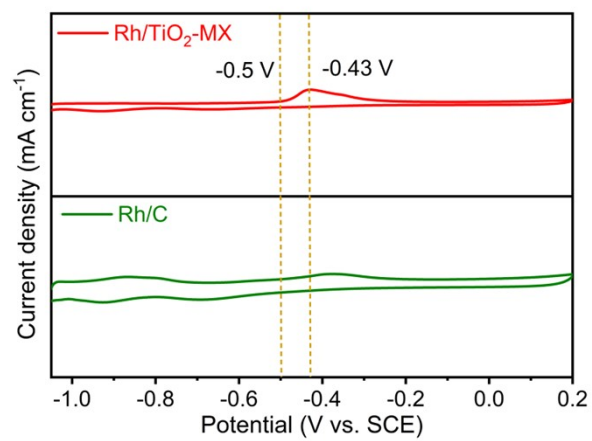

**Fig. S7** CO stripping voltammograms for Rh/TiO<sub>2</sub>-MX and Rh/C electrodes in 1 M KOH at 50 mV s<sup>-1</sup>.

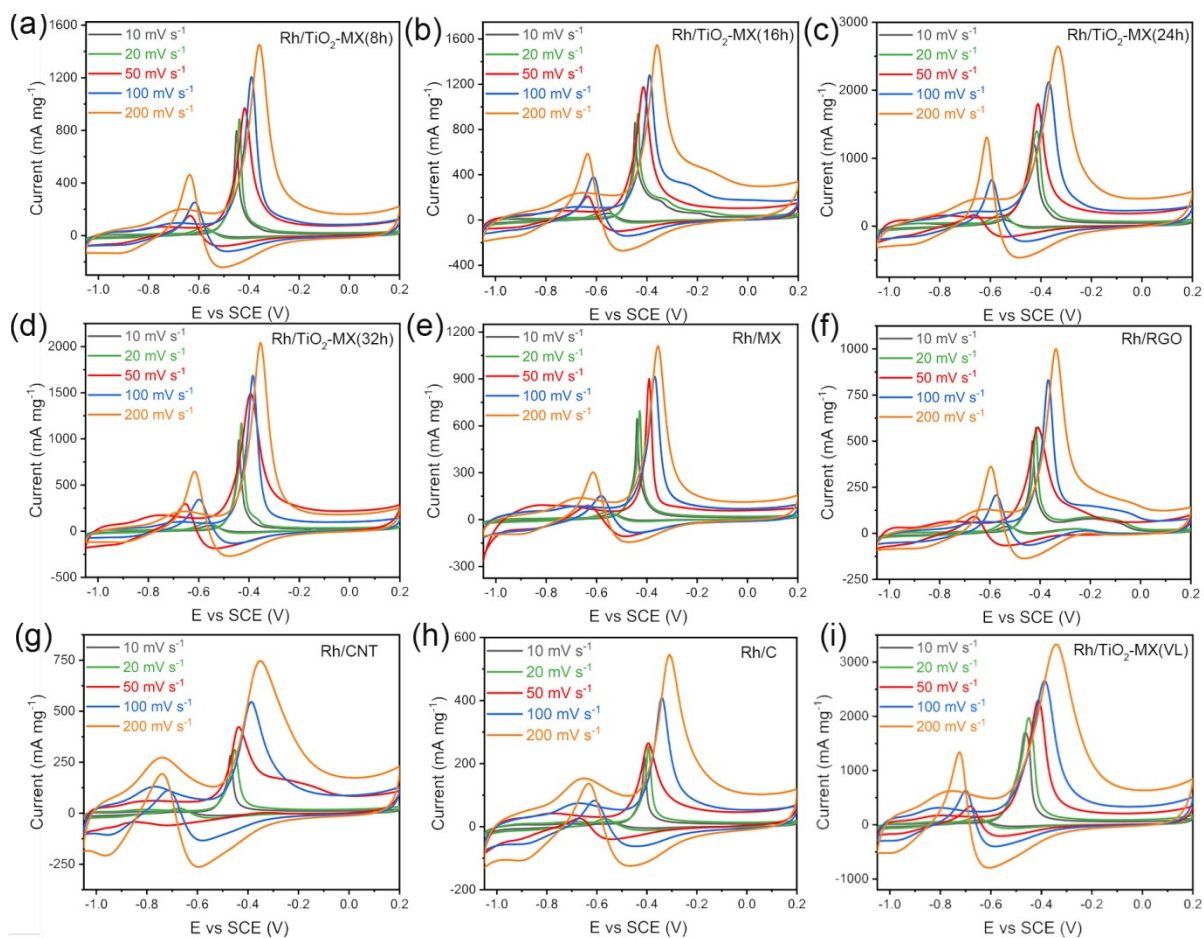

**Fig. S8** CV curves of (a) Rh/TiO<sub>2</sub>-MX(8h), (b) Rh/TiO<sub>2</sub>-MX(16h), (c) Rh/TiO<sub>2</sub>-MX(24h), (d) Rh/TiO<sub>2</sub>-MX(32h), (e) Rh/MXene, (f) Rh/RGO, (g) Rh/CNT, (h) Rh/C, and (i) Rh/TiO<sub>2</sub>-MX(VL) catalysts recorded at varying scan rates from 10 to 200 mV s<sup>-1</sup>.

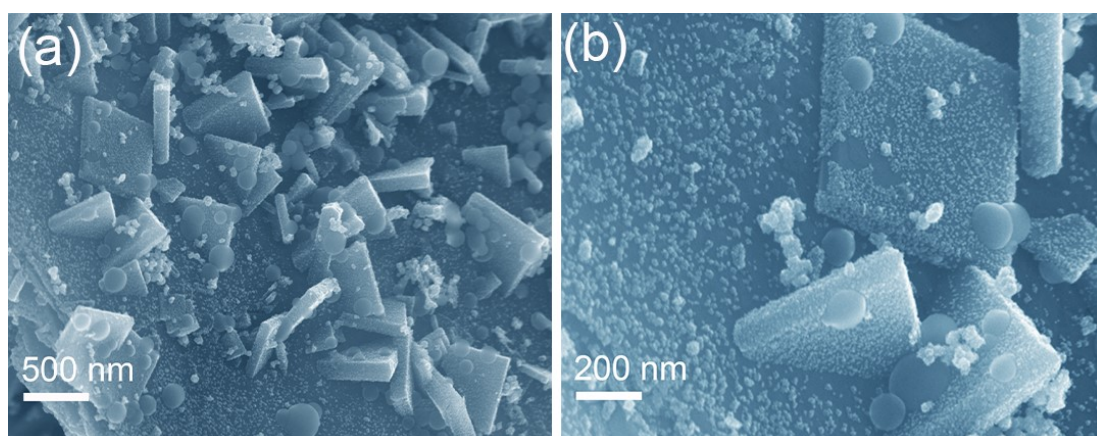

**Fig. S9** FE-SEM images of Rh/TiO<sub>2</sub>-MX after the long-term stability test.

**Table S1** Compiled study comparing CV results for different catalysts.

| Catalyst                     | ECSA<br>(m <sup>2</sup> g <sup>-1</sup> ) | Mass activity<br>(mA mg <sup>-1</sup> ) | Specific activity<br>(mA cm <sup>-2</sup> ) |
|------------------------------|-------------------------------------------|-----------------------------------------|---------------------------------------------|
| Rh/TiO <sub>2</sub> -MX(8h)  | 93.1                                      | 967.4                                   | 1.04                                        |
| Rh/TiO <sub>2</sub> -MX(16h) | 108.5                                     | 1170.4                                  | 1.08                                        |
| Rh/TiO <sub>2</sub> -MX(24h) | 122.5                                     | 1799.1                                  | 1.47                                        |
| Rh/TiO <sub>2</sub> -MX(32h) | 116.0                                     | 1488.3                                  | 1.28                                        |
| Rh/MX                        | 85.8                                      | 897.5                                   | 1.05                                        |
| Rh/RGO                       | 68.6                                      | 568.4                                   | 0.83                                        |
| Rh/CNT                       | 62.3                                      | 422.6                                   | 0.68                                        |
| Rh/C                         | 48.4                                      | 256.8                                   | 0.53                                        |
| Pt/C                         | 57.8                                      | 465.1                                   | 0.80                                        |
| Pd/C                         | 56.0                                      | 403.3                                   | 0.72                                        |

**Table S2** Comparison of methanol oxidation behavior for the Rh/TiO<sub>2</sub>-MX(24h) catalyst and various state-of-the-art Rh-based electrocatalysts.

| Catalyst                                         | ECSA<br>(m <sup>2</sup> g <sup>-1</sup> ) | Mass activity<br>(mA mg <sup>-1</sup> ) | Scan rate<br>(mV s <sup>-1</sup> ) | Electrolyte                        | Ref.      |
|--------------------------------------------------|-------------------------------------------|-----------------------------------------|------------------------------------|------------------------------------|-----------|
| Rh/TiO <sub>2</sub> -MX(24h)                     | 122.5                                     | 1799.1                                  | 50                                 | 1 M KOH+<br>1 M CH <sub>3</sub> OH | This work |
| Rh/TiO <sub>2</sub> -MX(VL)                      | 122.5                                     | 2275.0                                  | 50                                 | 1 M KOH+<br>1 M CH <sub>3</sub> OH | This work |
| Rh/MoS <sub>2</sub> -RGO                         | 95.5                                      | 1502                                    | 50                                 | 1 M KOH+<br>1 M CH <sub>3</sub> OH | [S1]      |
| Rh/CNT-RGO                                       | 123.8                                     | 1228.5                                  | 50                                 | 1 M KOH+<br>1 M CH <sub>3</sub> OH | [S2]      |
| Rh/(BNG) <sub>7</sub> -(CNT) <sub>3</sub>        | 105.4                                     | 814                                     | 50                                 | 1 M KOH+<br>1 M CH <sub>3</sub> OH | [S3]      |
| Rh/Ti <sub>3</sub> C <sub>2</sub> T <sub>x</sub> | 71.6                                      | 600.2                                   | 50                                 | 1 M KOH+<br>1 M CH <sub>3</sub> OH | [S4]      |
| Rh/3D graphene                                   | 67.3                                      | 486.7                                   | 50                                 | 1 M KOH+<br>1 M CH <sub>3</sub> OH | [S5]      |
| RhCo bimetalene                                  | 70.0                                      | 362.2                                   | 50                                 | 1 M KOH+<br>1 M CH <sub>3</sub> OH | [S6]      |
| Rh nanosheets                                    | 73.1                                      | 333                                     | 50                                 | 1 M KOH+<br>1 M CH <sub>3</sub> OH | [S7]      |
| Rh nanotubes                                     | 60.9                                      | 325                                     | 50                                 | 1 M KOH+<br>1 M CH <sub>3</sub> OH | [S8]      |
| Hollow Rh spheres                                | 50.7                                      | 292                                     | 50                                 | 1 M KOH+<br>1 M CH <sub>3</sub> OH | [S9]      |
| Rh nanosheets/RGO                                | 48.7                                      | 264                                     | 50                                 | 1 M KOH+<br>1 M CH <sub>3</sub> OH | [S10]     |

**Table S3** The charge-transfer resistances (R<sub>ct</sub>) of different electrodes.

| Electrode                    | R <sub>ct</sub> |           |
|------------------------------|-----------------|-----------|
|                              | Value (ohm)     | Error (%) |
| Rh/TiO <sub>2</sub> -MX(24h) | 7.5             | 1.3       |
| Rh/MXene                     | 30.9            | 1.5       |
| Rh/RGO                       | 40.5            | 1.4       |
| Rh/CNT                       | 43.7            | 1.6       |
| Rh/C                         | 5730.2          | 3.0       |

## Reference

- [S1] Q. Zhang, Y. Li, H. He and H. Huang, *ACS Sustain. Chem. Eng.*, 2022, **10**, 8940-8948.
- [S2] Y. Li, Y. Chen, J. Qin, J. Chen, Y. Zhao, Y. Xie, H. He and H. Huang, *ChemNanoMat*, 2022, **8**, e202200176.
- [S3] Y. Xue, J. Xiong, H. Zhang, H. He, H. Huang, *Catal. Sci. Technol.*, 2022, **10**, 6016-6023.
- [S4] J. Qin, H. Huang, Y. Xie, S. Pan, Y. Chen, L. Yang, Q. Jiang and H. He, *Ceram. Int.*, 2022, **48**, 15327-15333.
- [S5] Y. Yang, H. Huang, C. Yang and H. He, *ACS Appl. Energy Mater.*, 2021, **4**, 376-383.
- [S6] W. Zhong, B. Miao, M. Wang, Y. Ding, D. Li, S. Yin, X. Li, Y. Chen, *J. Mater. Chem. A*, 2022, **10**, 20343-20349.
- [S7] J. Zhu, S. Chen, Q. Xue, F. Li, H. Yao, L. Xu and Y. Chen, *Appl. Catal. B-Environ.*, 2020, **264**, 118520.
- [S8] S. Wang, S. Liu, Z. Wang, Z. Dai, H. Yu, Y. Xu, X. Li, L. Wang and H. Wang, *J. Mater. Chem. A*, 2021, **9**, 4744-4750.
- [S9] Y. Kang, Q. Xue, Y. Zhao, X. Li, P. Jin and Y. Chen, *Small*, 2018, **18**, e1801239.
- [S10] Y. Kang, Q. Xue, P. Jin, J. Jiang, J. Zeng and Y. Chen, *ACS Sustain. Chem. Eng.*, 2017, **5**, 10156-10162.
